# Supplementary material for: Phage Display-Based Homing Peptide-Daunomycin Conjugates for Selective Drug Targeting to PANC-1 Pancreatic Cancer
Source: PubMed Central journal article supplement (PMC7355684; doi:10.3390/pharmaceutics12060576), 2020-06-22
Supplement: pharmaceutics-12-00576-s001.pdf [file pharmaceutics-12-00576-s001.pdf]

1 *Supplementary information*

## 2 **Phage display-based homing peptide - daunomycin** 3 **conjugates for selective drug targeting to PANC-1** 4 **Pancreatic Cancer**

5 **Levente E. Dókus<sup>1,2</sup>, Eszter Lajkó<sup>3</sup>, Ivan Randelović<sup>4</sup>, Diána Mező<sup>3</sup>, Gitta Schlosser<sup>1,2</sup>, László**  
6 **Kóhidai<sup>3</sup>, József Tóvári<sup>4</sup> and Gábor Mező<sup>1,2\*</sup>**

7 <sup>1</sup>MTA-ELTE Research Group of Peptide Chemistry, Hungarian Academy of Sciences,  
8 Budapest, Hungary ([doehabt@caesar.elte.hu](mailto:doehabt@caesar.elte.hu))

9 <sup>2</sup>Eötvös Loránd University, Faculty of Sciences, Institute of Chemistry, Budapest, Hungary

10 <sup>3</sup>Department of Genetics, Cell- and Immunobiology, Semmelweis University, Budapest,  
11 Hungary

12 <sup>4</sup>National Institute of Oncology, Department of Experimental Pharmacology, Budapest,  
13 Hungary

14 \*Correspondence: [gmezo@elte.hu](mailto:gmezo@elte.hu), Tel.: +36 1 372-2500/1430

15

16 **Table S1.** *In vitro* cytotoxic effect of the prepared conjugates on various cell lines

| Code | Compounds                                    | Viability <sup>a</sup> (%) at 10 <sup>-5</sup> M concentration,<br>after 72 h incubation |             |             |
|------|----------------------------------------------|------------------------------------------------------------------------------------------|-------------|-------------|
|      |                                              | Colo-205                                                                                 | A2058       | EBC-1       |
| 1    | <i>Dau=Aoa-SKAAKN-OH</i>                     | 50.7 ± 1.6                                                                               | 61.5 ± 2.7  | 77.8 ± 1.0  |
| 2    | <i>Dau=Aoa-KSKAAKN-OH</i>                    | 51.0 ± 2.5                                                                               | 63.5 ± 4.6  | 90.2 ± 3.0  |
| 3    | <i>Dau=Aoa-GFLG-KSKAAKN-OH</i>               | 59.3 ± 3.6                                                                               | 79.4 ± 17.6 | 76.2 ± 13.7 |
| 4    | <i>Dau=Aoa-GFLG-K(Dau=Aoa)SKAAKN-OH</i>      | 19.8 ± 0.5                                                                               | 29.8 ± 4.5  | 32.2 ± 4.2  |
| 5    | <i>Dau=Aoa-GFLG-K(Dau=Aoa-GFLG)SKAAKN-OH</i> | 45.8 ± 2.6                                                                               | 61.9 ± 11.6 | 57.6 ± 11.1 |

17 <sup>a</sup> Fluorescence intensity data of the treated cells are normalized to the fluorescence intensity data values of the  
18 control wells and expressed as percentages. Data are given as mean values ± standard deviation (SD), (n=3).

19

20 **Table S2.** Relative fluorescence intensity results of binding and cellular uptake measurements on  
 21 PANC-1 cells

| Code | Compounds                                    | Relative fluorescence intensity<br>(GeoMean values) <sup>a</sup> |                  |
|------|----------------------------------------------|------------------------------------------------------------------|------------------|
|      |                                              | Binding                                                          | Cellular uptake  |
|      | <i>Daunomycin</i>                            | 72.057 ± 3.907                                                   | 702.048 ± 84.340 |
| 1    | <i>Dau=Aoa-SKAAKN-OH</i>                     | 0.086 ± 0.173                                                    | 1.630 ± 0.356    |
| 2    | <i>Dau=Aoa-KSKAAKN-OH</i>                    | 0.830 ± 0.157                                                    | 5.228 ± 0.257    |
| 3    | <i>Dau=Aoa-GFLG-KSKAAKN-OH</i>               | 0.012 ± 0.011                                                    | 0.459 ± 0.189    |
| 4    | <i>Dau=Aoa-GFLG-K(Dau=Aoa)SKAAKN-OH</i>      | 0.463 ± 0.147                                                    | 7.666 ± 1.147    |
| 5    | <i>Dau=Aoa-GFLG-K(Dau=Aoa-GFLG)SKAAKN-OH</i> | 0.071 ± 0.082                                                    | 2.779 ± 0.575    |

22 <sup>a</sup> Binding and cellular uptake of the compounds were studied at 10<sup>-5</sup> M concentration. GeoMean value  
 23 (geometric mean channel value) is a dimensionless value and refers to the relative fluorescence intensity. Data  
 24 shown are mean of 2 parallels ± SD.

### 25 Analytical chromatograms of compounds:

26 Analytical RP-HPLC was performed on a Waters Symmetry (WAT 045905) C18 column  
 27 (150x4.6mm I.D.) with 5 μm silica (100 Å pore size) as a stationary phase. A linear gradient elution  
 28 was developed: 0 min 0% B; 2 min 0% B; 22 min 90% B with eluent A (0.1% TFA in water) and eluent  
 29 B (0.1% TFA in acetonitrile-water (80: 20, v/v)). A flow rate of 1 mL/min was used at ambient  
 30 temperature. Samples were applied dissolved in eluent A and 20 μl was injected. Peaks were  
 31 detected at λ = 220 nm.  
 32

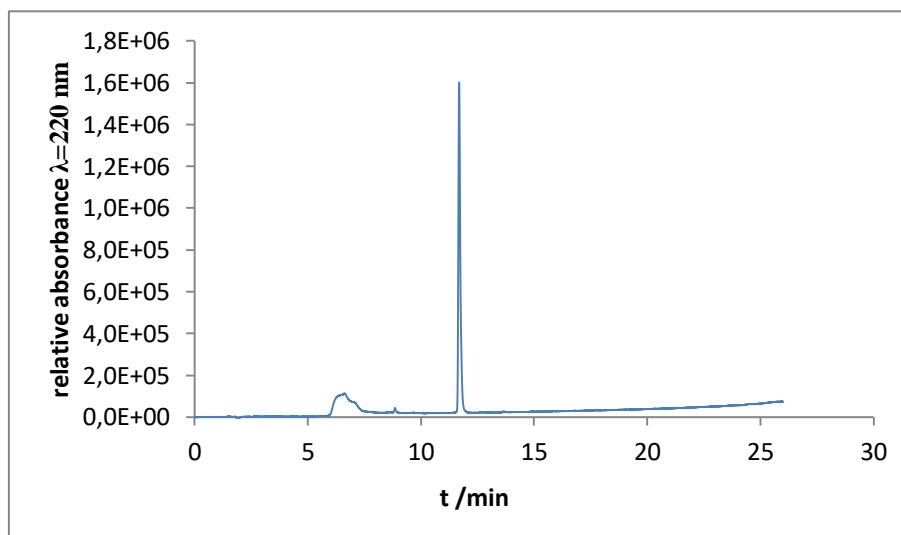

33  
 34 **Figure S1.** Analytical chromatogram of compound 1 (*Dau=Aoa-SKAAKN-OH*)

35

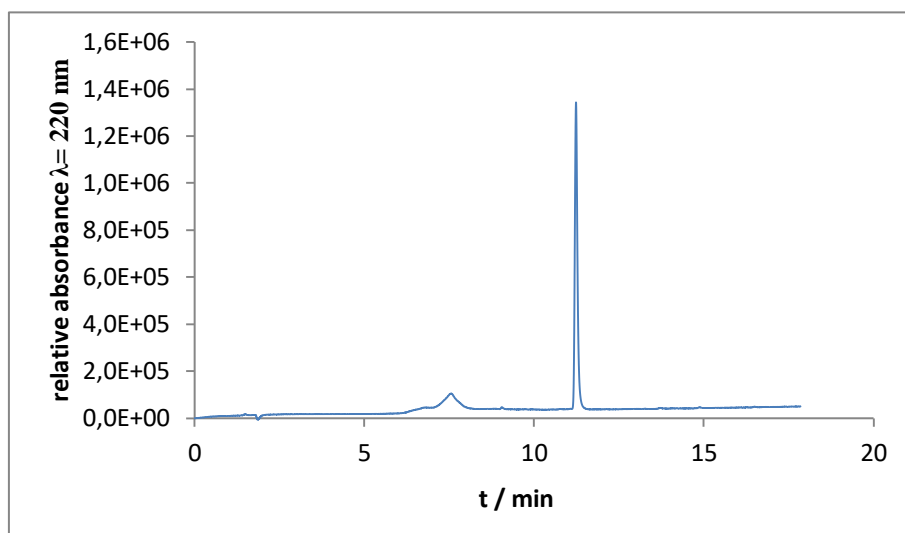

36

37

**Figure S2.** Analytical chromatogram of compound **2** (*Dau=Aoa-KSKAAKN-OH*)

38

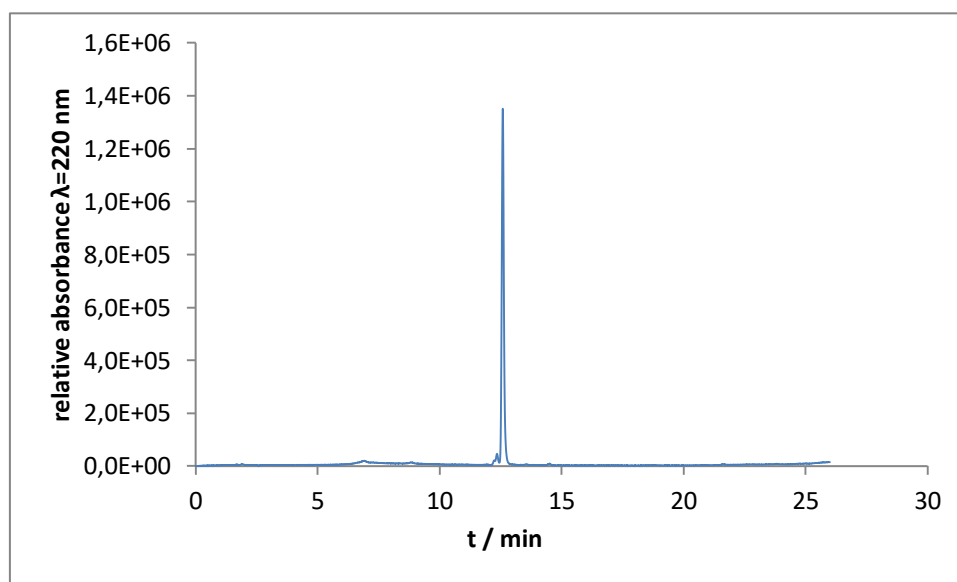

39

40

**Figure S3.** Analytical chromatogram of compound **3** (*Dau=Aoa-GFLGKSKAAKN-OH*)

41

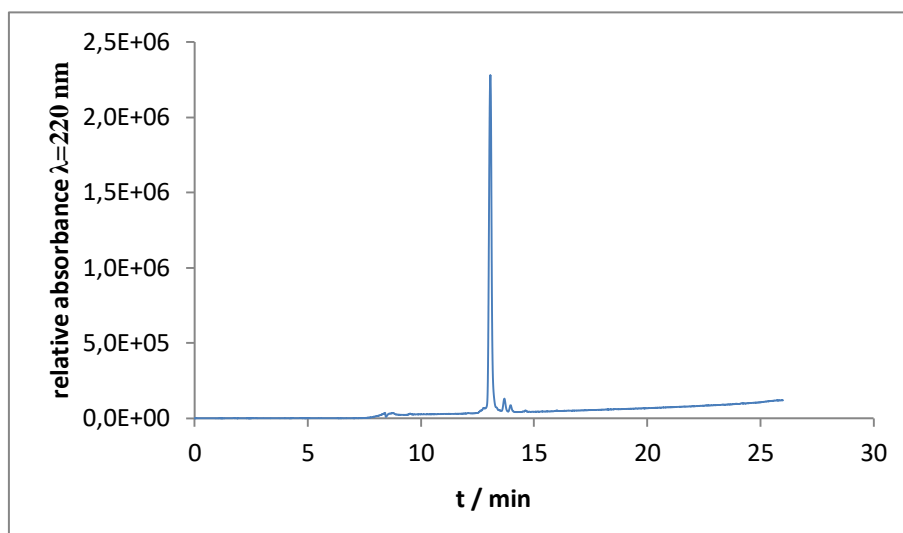

42

43 **Figure S4.** Analytical chromatogram of compound **4** (*Dau=Aoa-GFLGK(Dau=Aoa)SKAAKN-OH*)

44

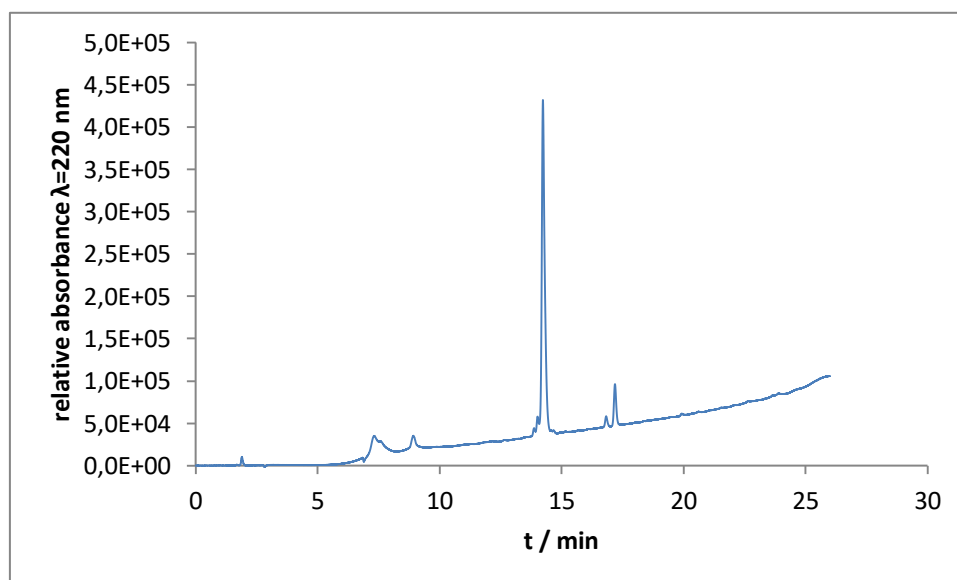

45

46 **Figure S5.** Analytical chromatogram of compound  
 47 (*Dau=Aoa-GFLG*)K(*Dau=Aoa-GFLG*)SKAAKN-OH)

48 **Mass spectrometry**

49 The identification of the peptide analogues and conjugates was achieved by electrospray  
 50 ionization mass spectrometry (ESI-MS) on a Bruker Daltonics Esquire 3000 Plus (Bremen, Germany)  
 51 ion trap mass spectrometer, operating in continuous sample injection at 4  $\mu\text{L}/\text{min}$  flow rate. Samples  
 52 were dissolved in ACN-water (50:50 v/v%) mixture containing 0.1 v/v% AcOH. Mass spectra were  
 53 recorded in positive ion mode in the  $m/z$  50-2000 range.

54

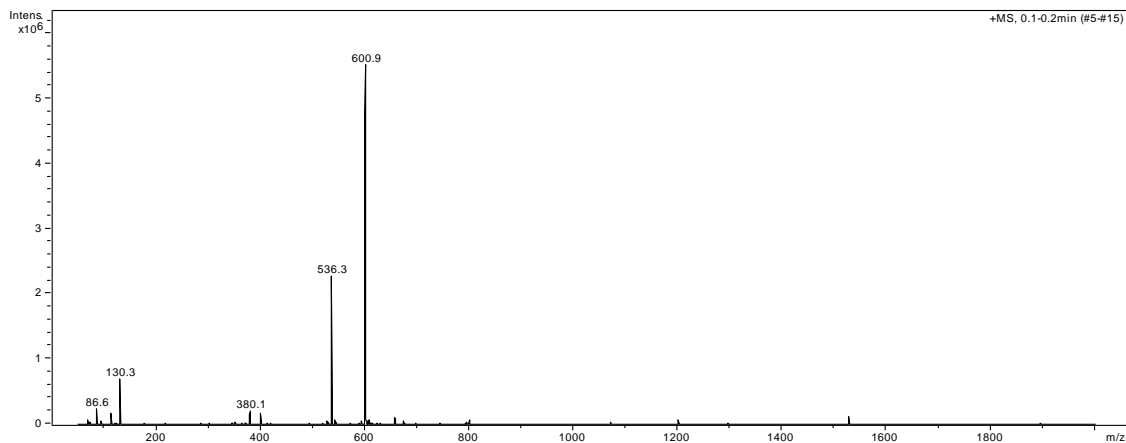

55

56

Figure S6. Mass spectra of compound 1

57

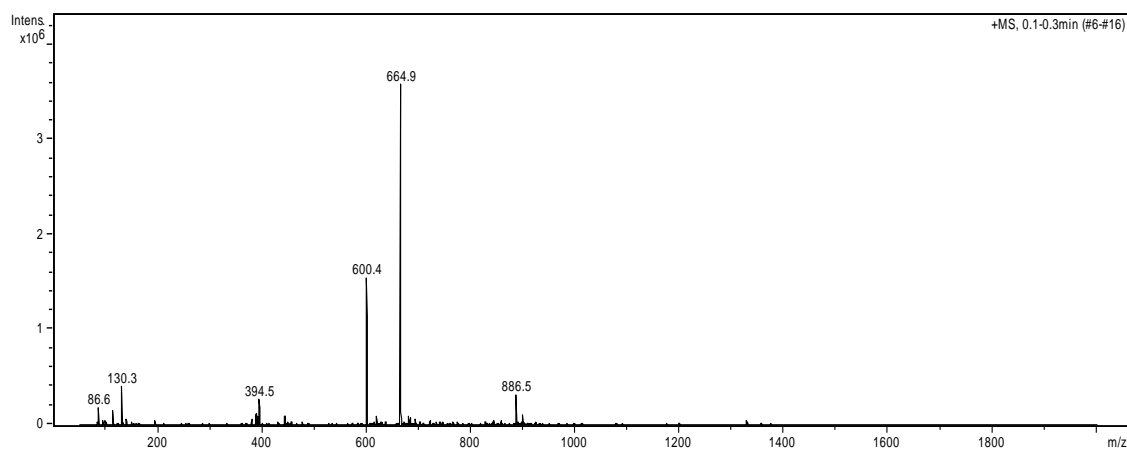

58

59

Figure S7. Mass spectra of compound 2

60

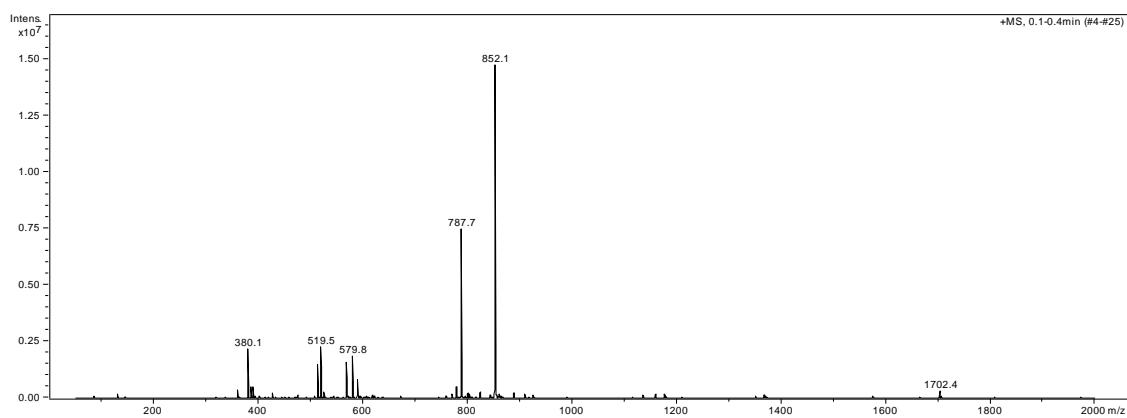

61

62

Figure S8. Mass spectra of compound 3

63

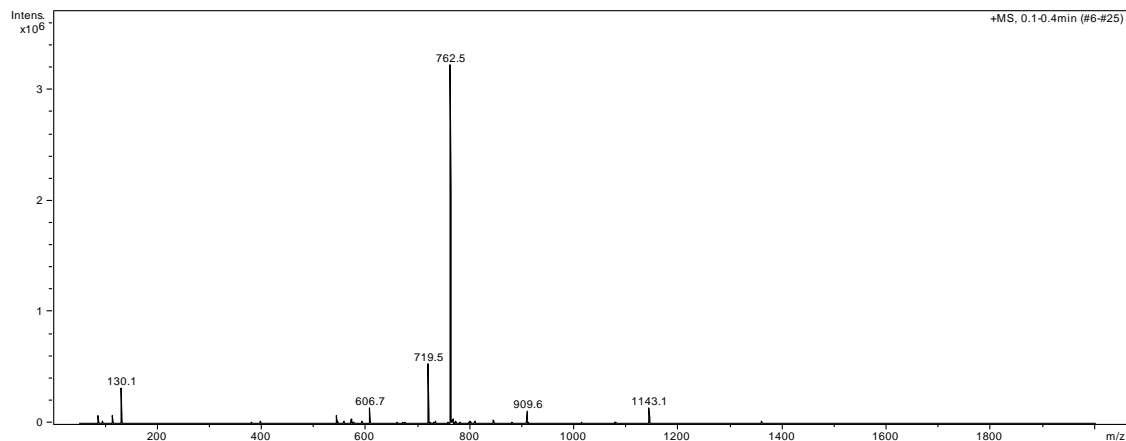

64

65 **Figure S9.** Mass spectra of compound 4

66

67

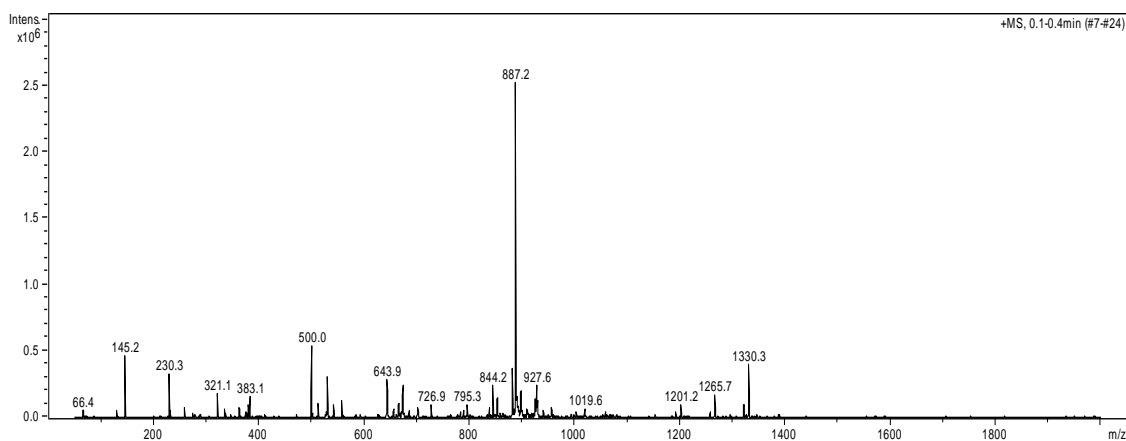

68

69 **Figure S10:** Mass spectra of compound 5

70 **Chemical characterization of identified fragments of the various conjugates under the enzymatic**  
 71 **degradation**

72 **Table S3.** Chemical characterization of identified fragments of conjugate 1

| Product of the degradation | R <sub>t</sub> (min.) | M <sub>(cal.)</sub> | M <sub>(meas.)</sub> |
|----------------------------|-----------------------|---------------------|----------------------|
| <i>Dau=Aoa-S-OH</i>        | 11.17                 | 687.2276            | 687.2274             |
| <i>Dau=Aoa-SK-OH</i>       | 9.99                  | 815.3225            | 815.3217             |

73

74 **Table S4.** Chemical characterization of identified fragments of conjugate 2

| Product of the degradation | R <sub>t</sub> (min.) | M <sub>(cal.)</sub> | M <sub>(meas.)</sub> |
|----------------------------|-----------------------|---------------------|----------------------|
| <i>Dau=Aoa-K-OH</i>        | 11.4                  | 728.2905            | 728.2900             |
| <i>Dau=Aoa-KS-OH</i>       | 12.5                  | 815.3225            | 815.3223             |
| <i>Dau=Aoa-KSK-OH</i>      | 13.1                  | 943.4175            | 943.4171             |

75

76

77

78

**Table S5.** Chemical characterization of identified fragments of conjugate 3

| Product of the degradation    | R <sub>t</sub> (min.) | M <sub>(cal.)</sub> | M <sub>(meas.)</sub> |
|-------------------------------|-----------------------|---------------------|----------------------|
| <i>Dau=Aoa-G-OH</i>           | 11.4                  | 657.2170            | 657.2168             |
| <i>Dau=Aoa-GF-OH</i>          | 12.5                  | 804.2854            | 804.2855             |
| <i>Dau=Aoa-GFL-OH</i>         | 13.1                  | 917.3695            | 917.3690             |
| <i>Dau=Aoa-GFLGK-OH</i>       | 11.9                  | 1102.4859           | 1102.4851            |
| <i>Dau=Aoa-GFLGKSK-OH</i>     | 10.5                  | 1317.6129           | 1317.6122            |
| <i>Dau=Aoa-GFLGKSKAA-OH</i>   | 10.5                  | 1459.6871           | 1459.6864            |
| <i>Dau=Aoa-GFLGKSKAAKN-OH</i> | 9.9                   | 1701.8250           | 1701.8237            |

79

80

81

**Table S6.** Chemical characterization of identified fragments of conjugate 4

82

83

84

85

86

87

88

89

90

91

92

93

94

95

**Table S7.** Chemical characterization of identified fragments of conjugate 5

| Product of the degradation                  | R <sub>t</sub> (min.) | M <sub>(cal.)</sub> | M <sub>(meas.)</sub> |
|---------------------------------------------|-----------------------|---------------------|----------------------|
| <i>Dau=Aoa-G-OH</i>                         | 11.4                  | 657.2170            | 657.2168             |
| <i>Dau=Aoa-GF-OH</i>                        | 12.5                  | 804.2854            | 804.2855             |
| <i>Dau=Aoa-GFL-OH</i>                       | 13.1                  | 917.3695            | 917.3690             |
| <i>H-K(Dau=Aoa-GFLG)-OH</i>                 | 11.9                  | 1102.4859           | 1102.4851            |
| <i>H-K(Dau=Aoa-GFLG)SK-OH</i>               | 10.5                  | 1317.6129           | 1317.6122            |
| <i>H-K(Dau=Aoa-GFLG)SKAA-OH</i>             | 10.5                  | 1459.6871           | 1459.6864            |
| <i>H-K(Dau=Aoa-GFLG)SKAAKN-OH</i>           | 9.9                   | 1701.8200           | 1701.8239            |
| <i>Dau=Aoa-GFLGK(Dau=Aoa-GFLG)SKAAKN-OH</i> | 11.1                  | 2658.2054           | 2658.2037            |
